# Supplementary material
Source: publisher figshare collection journal article supplement (https://frontiersin.figshare.com/ndownloader/files/26179688)
Supplement: Supplementary file 1 [file 26179688]

**Original image of the article**

**Figure 5**

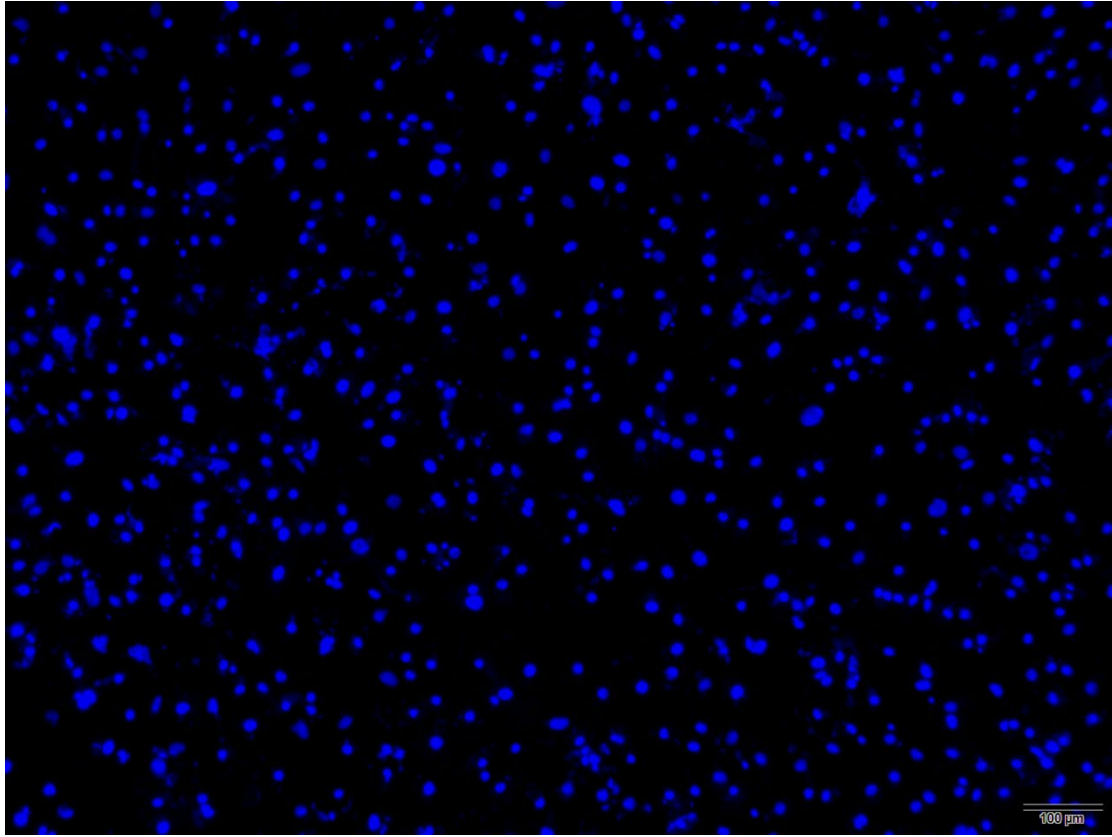

Figure 5A. Photomicrographs (100×) of apoptotic cells(LV-control DAPI)

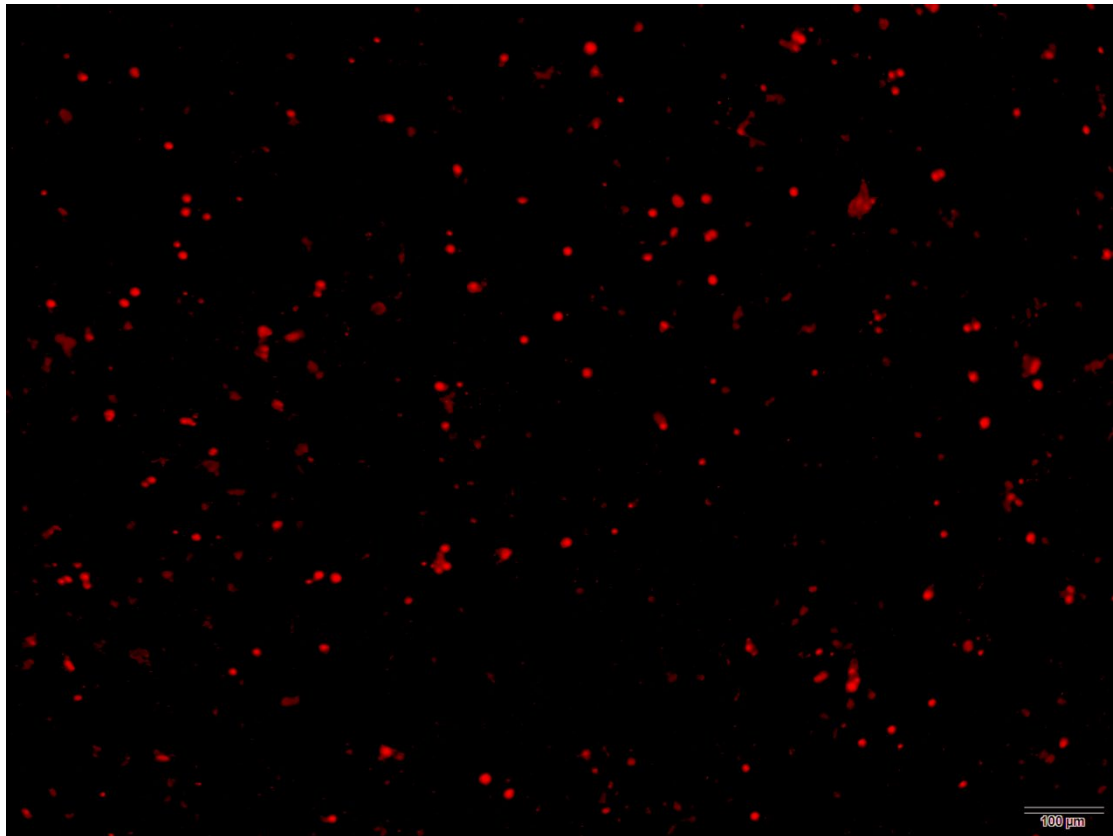

Figure 5A. Photomicrographs (100×) of apoptotic cells(LV-control-TUNEL)

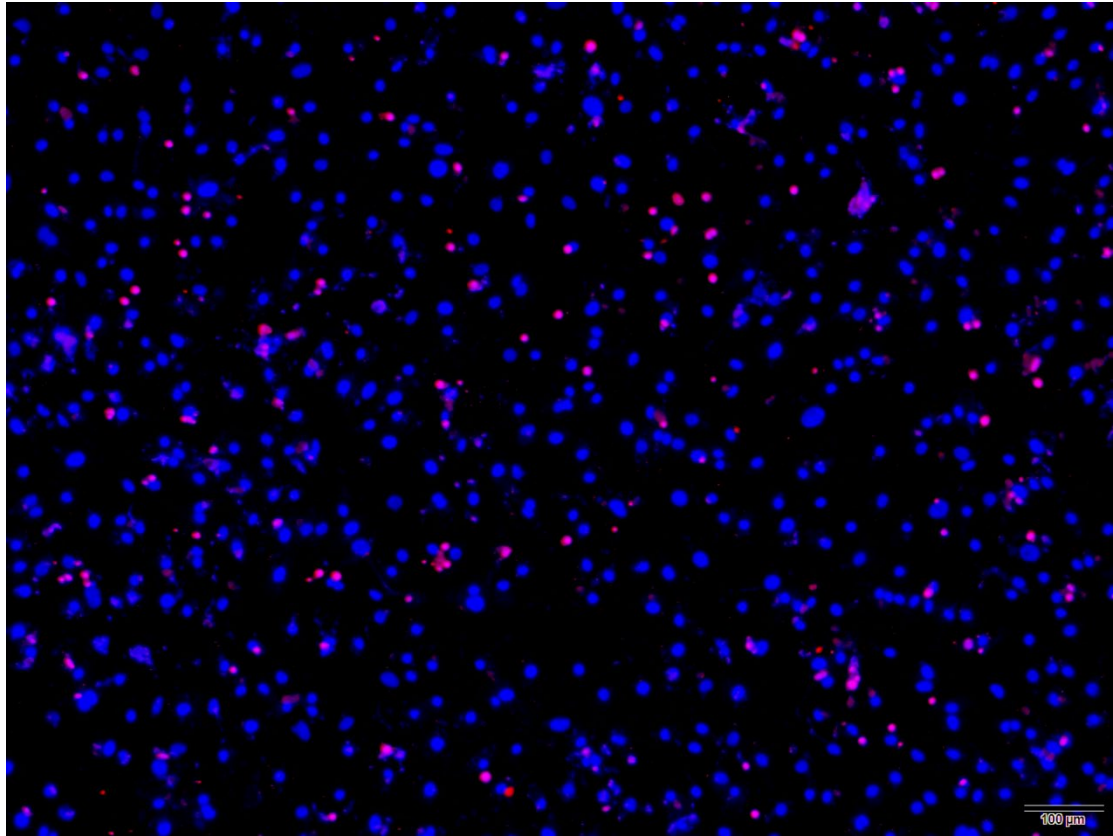

Figure 5A. Photomicrographs (100×) of apoptotic cells(LV-control-Merge)

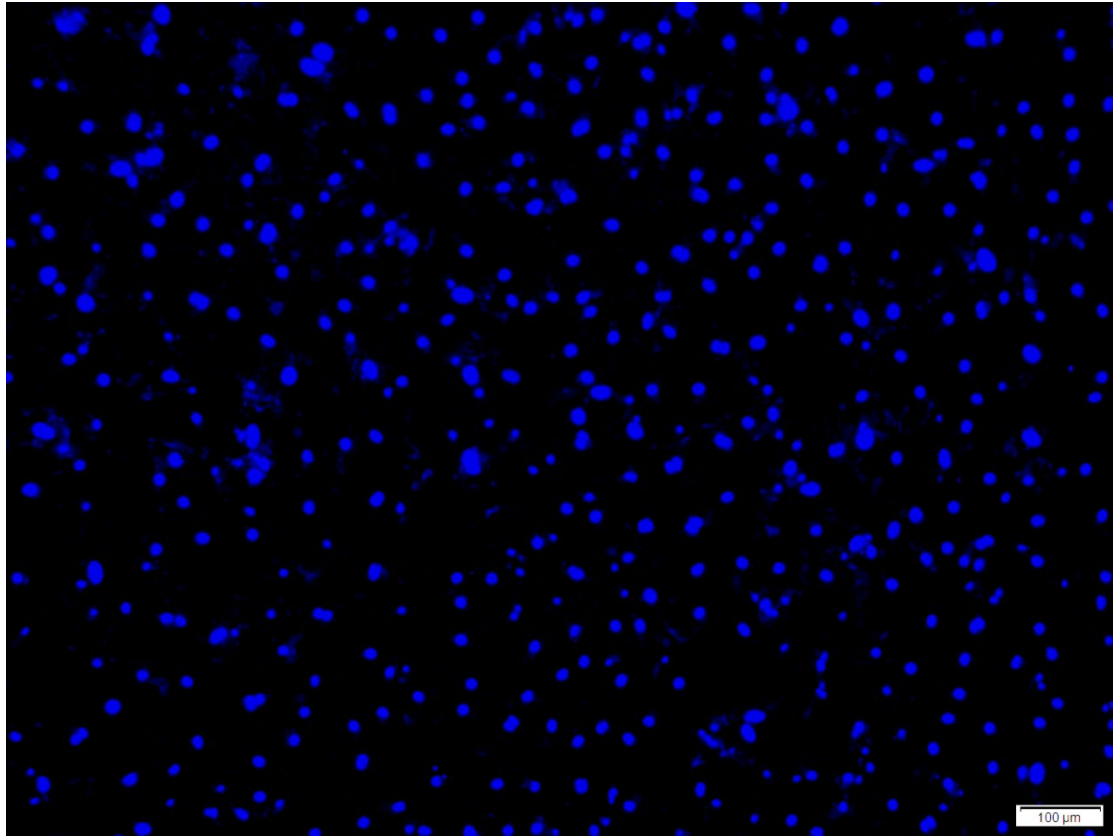

Figure 5A. Photomicrographs (100×) of apoptotic cells(LV-sh-STAT3 DAPI)

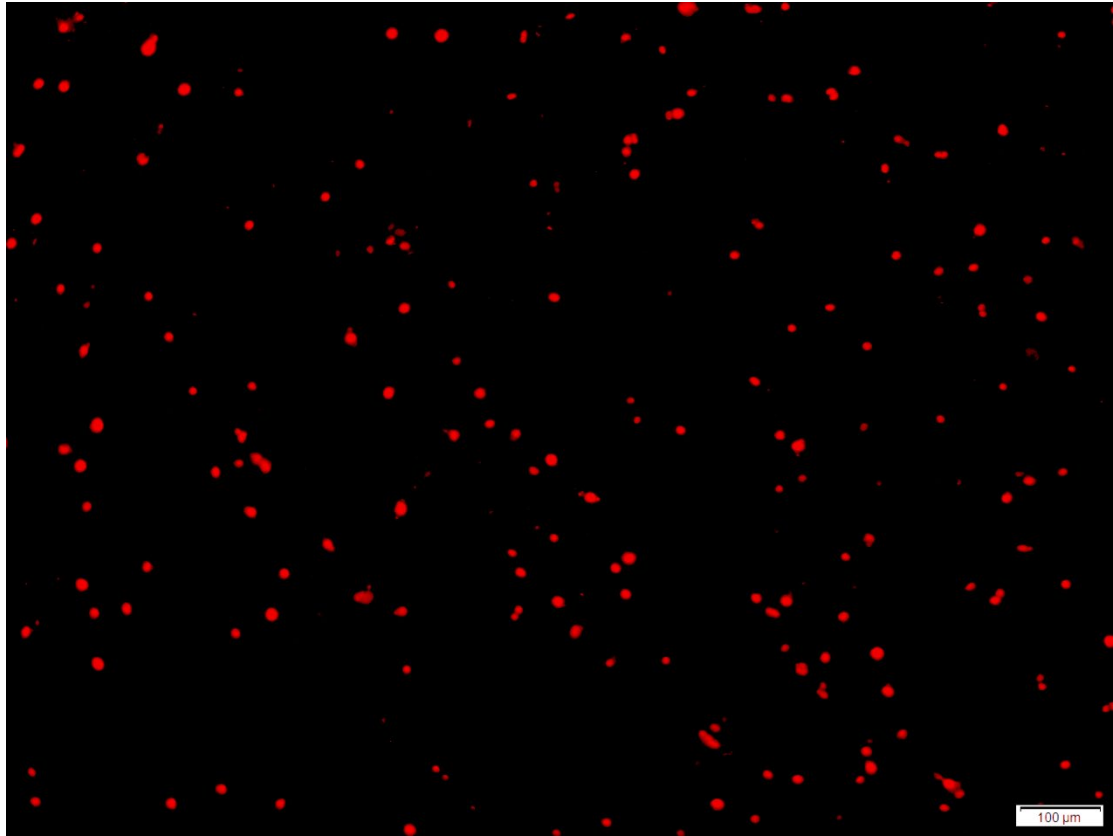

Figure 5A. Photomicrographs (100×) of apoptotic cells(LV-sh-STAT3 TUNEL)

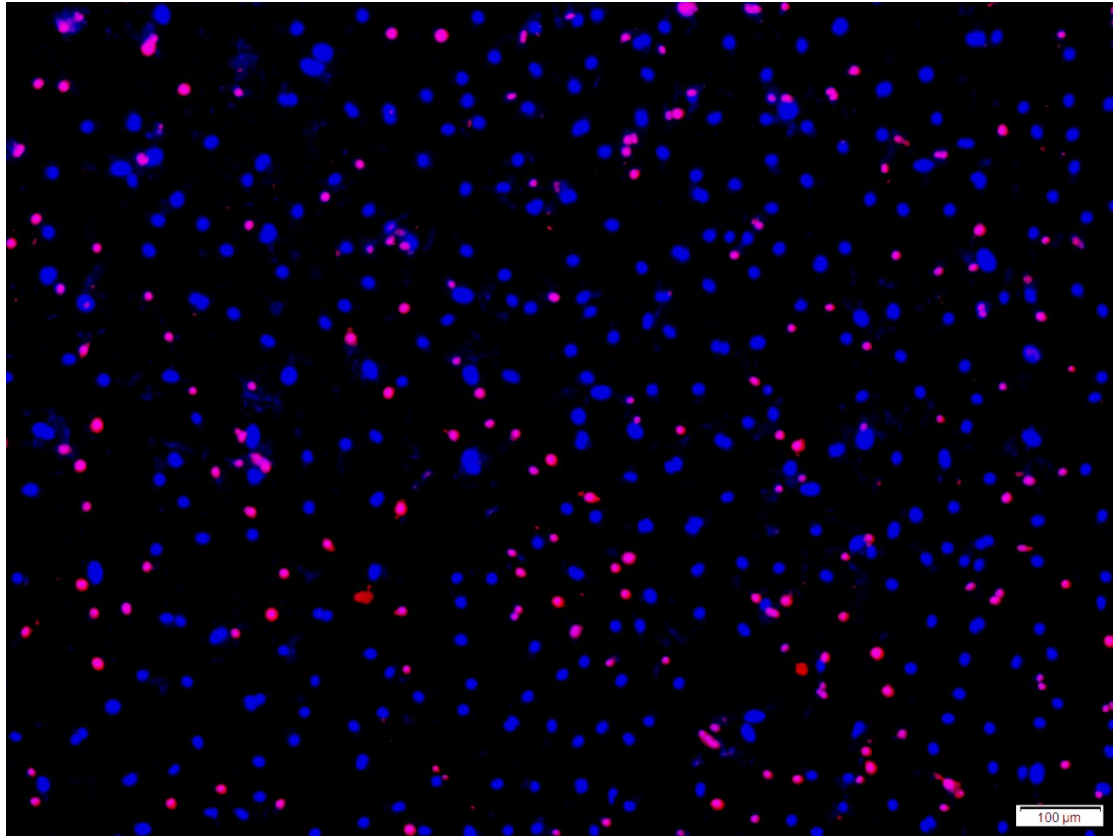

Figure 5A. Photomicrographs (100×) of apoptotic cells(LV-sh-STAT3 Merge)

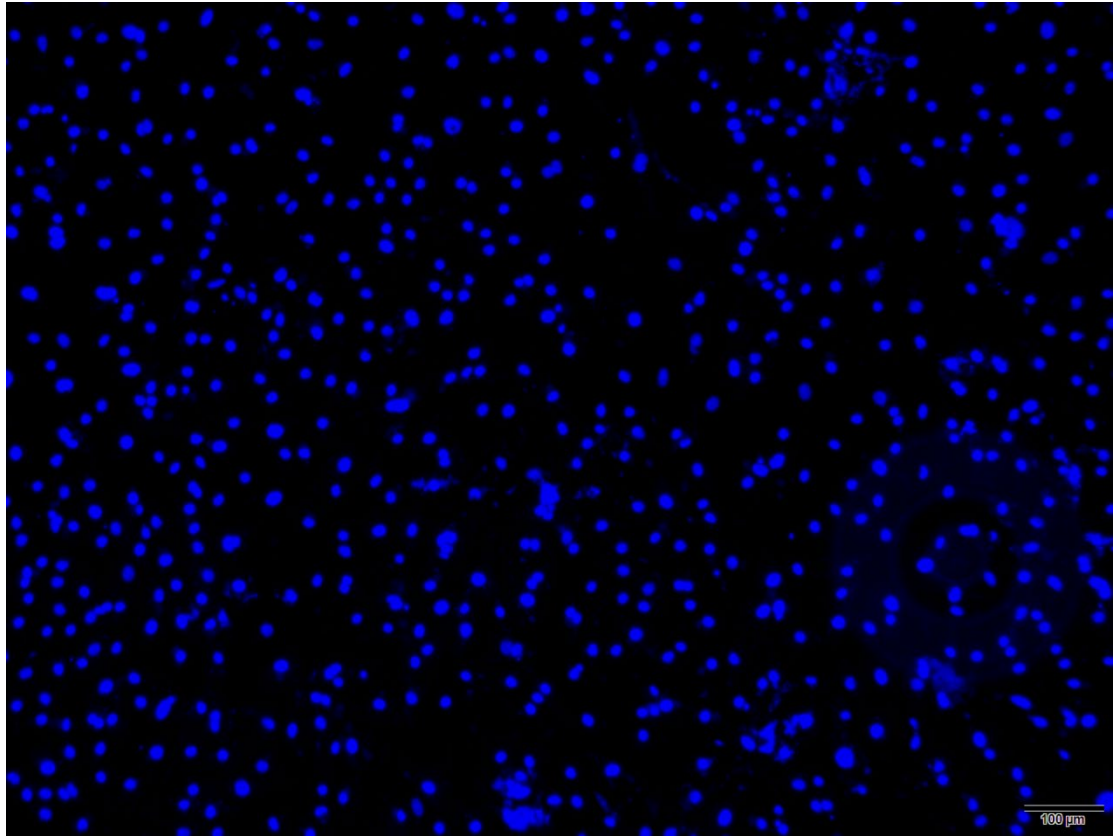

Figure 5A. Photomicrographs (100×) of apoptotic cells(LV-STAT3 DAPI)

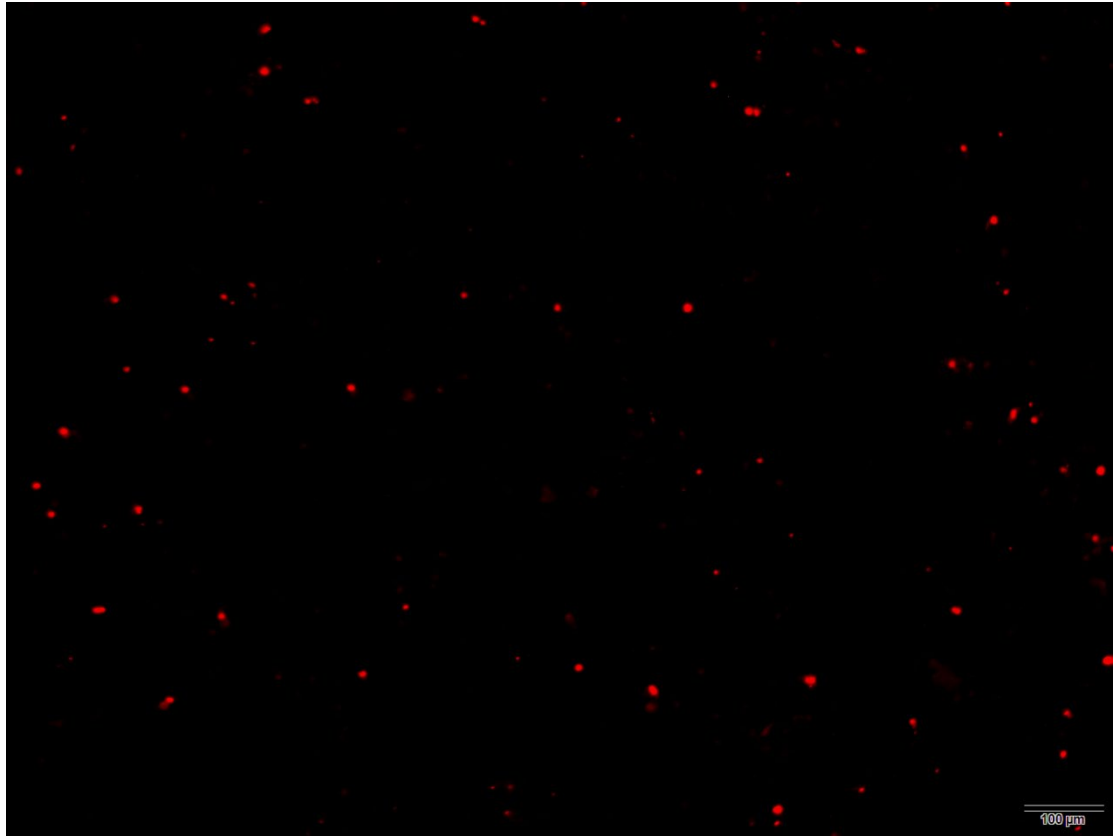

Figure 5A. Photomicrographs (100×) of apoptotic cells(LV-STAT3 TUNEL)



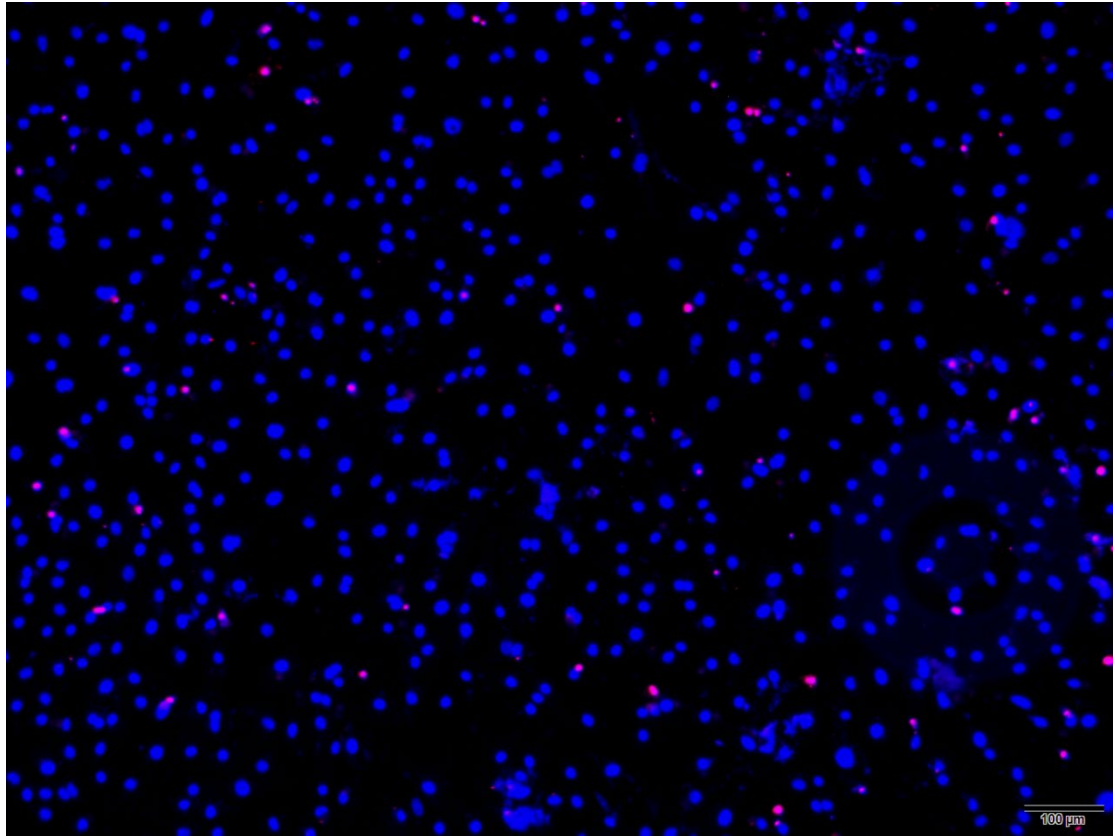

Figure 5A. Photomicrographs (100×) of apoptotic cells(LV-STAT3 Merge)

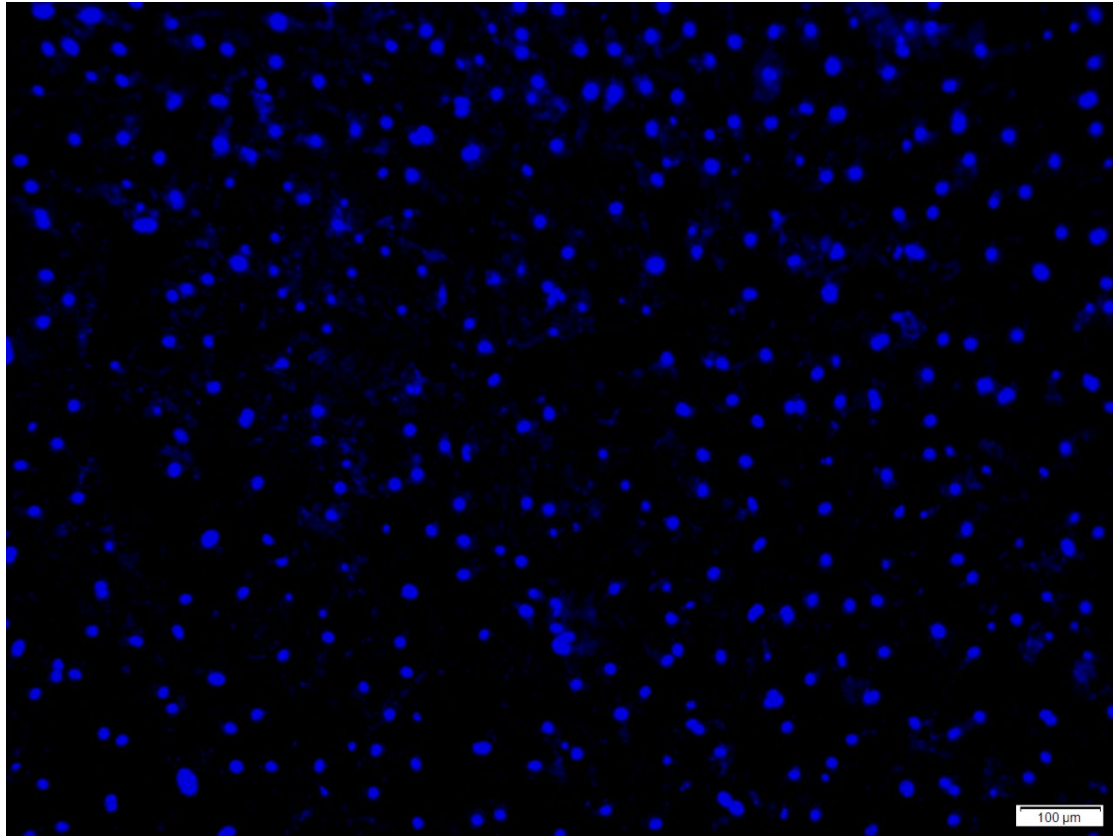

Figure 5A. Photomicrographs (100×) of apoptotic cells(LV-STAT3+YM155 DAPI)

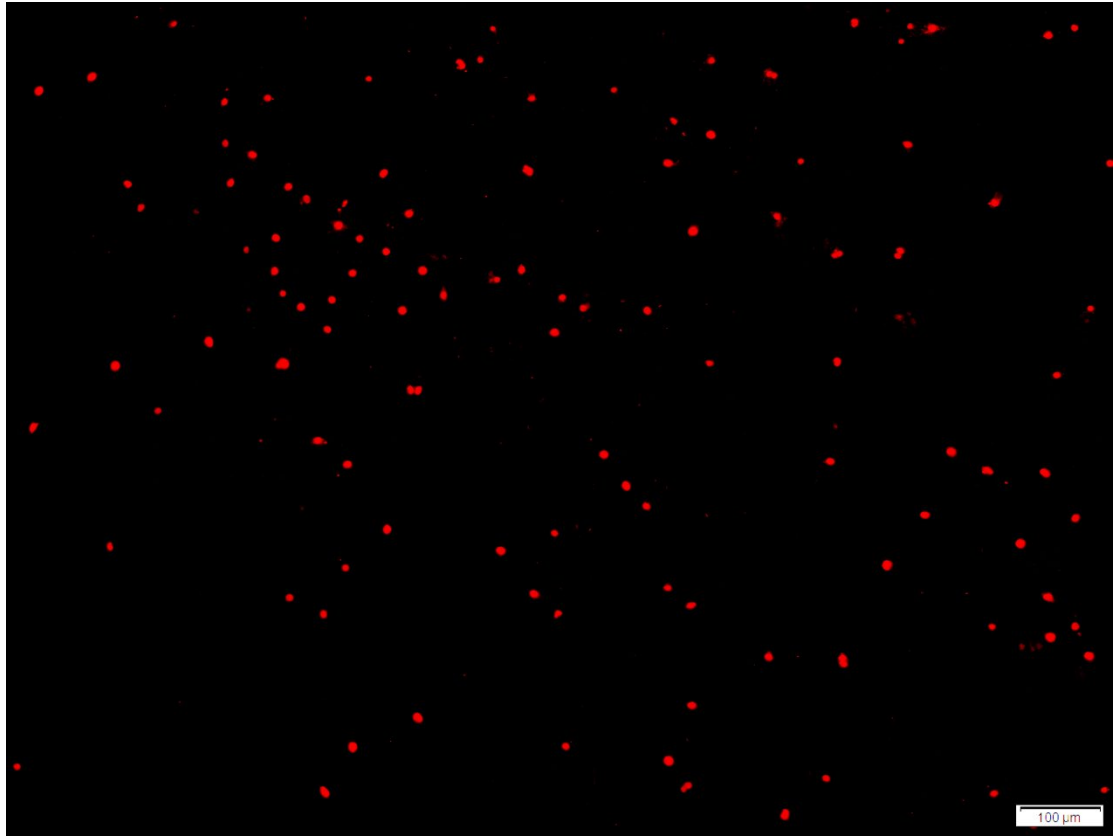

Figure 5A. Photomicrographs (100×) of apoptotic cells(LV-STAT3+YM155 TUNEL)

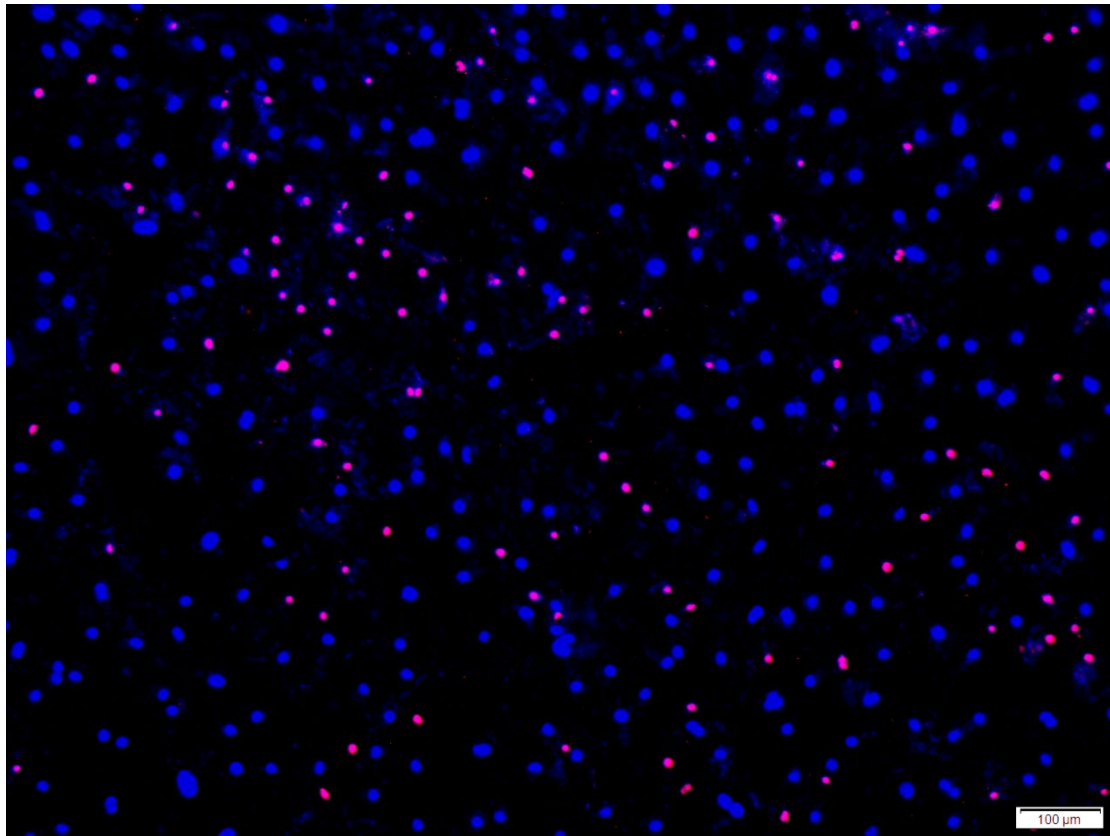

Figure 5A. Photomicrographs (100×) of apoptotic cells(LV-STAT3+YM155 Merge)

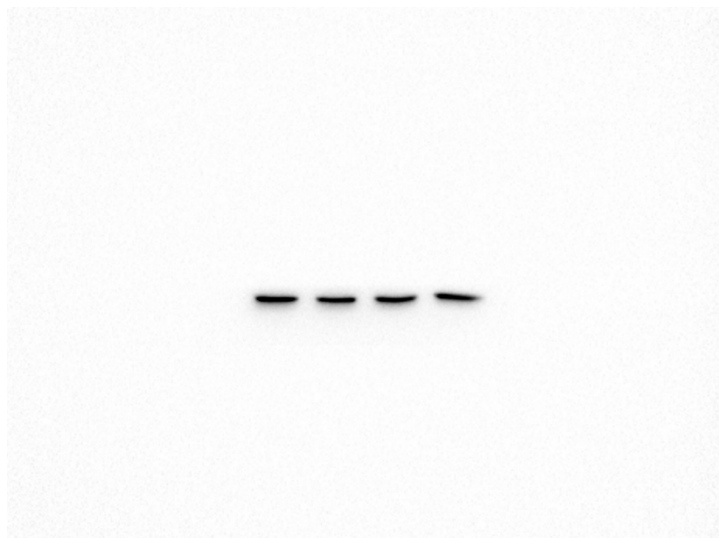

Figure 5B. GAPDH protein expression

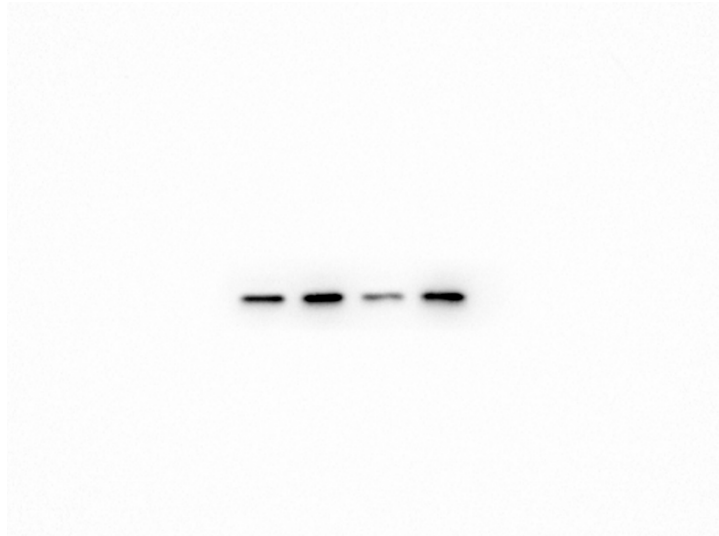

Figure 5B. Bax protein expression

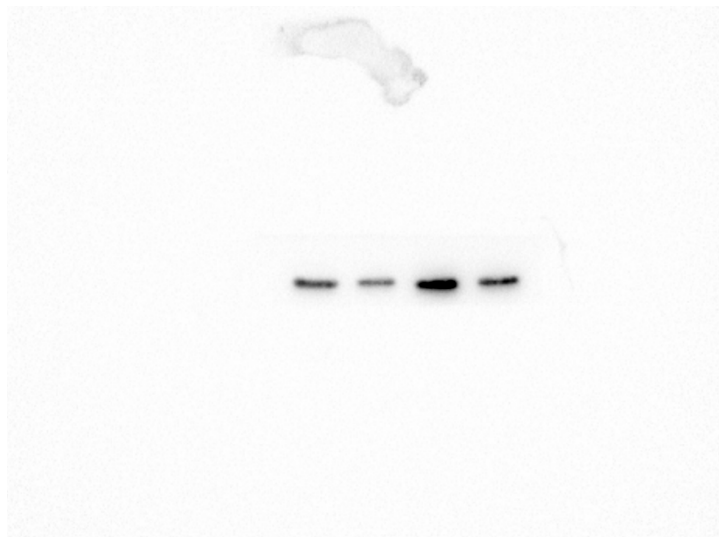

Figure 5B. Bcl-2 protein expression

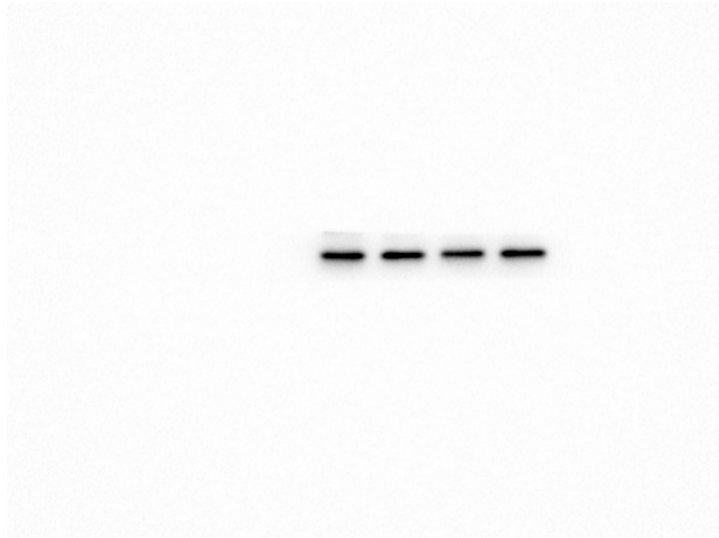

Figure 5B. Caspase 3 protein expression

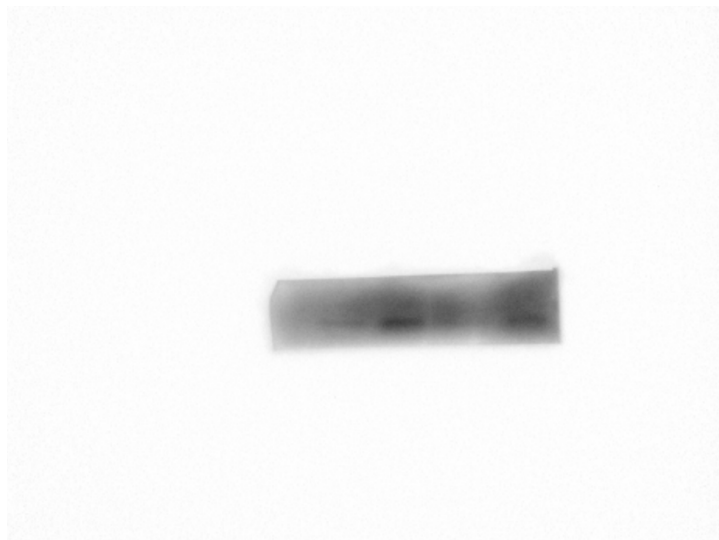

Figure 5B. Cleaved Caspase 3 protein expression
